# Supplementary material for: Switchable magnetic bulk photovoltaic effect in the two-dimensional magnet CrI3
Source: PubMed Central journal article supplement (PMC6706386; doi:10.1038/s41467-019-11832-3), 2019-08-22
Supplement: 41467_2019_11832_MOESM1_ESM.pdf [file 41467_2019_11832_MOESM1_ESM.pdf]

# Supplemental Materials for “Magnetically Switchable Light-Matter Interaction in the Two-Dimensional Magnet CrI<sub>3</sub>”

Yang Zhang,<sup>1,2,3</sup> Tobias Holder,<sup>4</sup> Hiroaki Ishizuka,<sup>5</sup> Fernando de  
Juan,<sup>6,7</sup> Naoto Nagaosa,<sup>8,9</sup> Claudia Felser,<sup>1</sup> and Binghai Yan <sup>\*10</sup>

<sup>1</sup>*Max Planck Institute for Chemical Physics of Solids, 01187 Dresden, Germany*

<sup>2</sup>*Leibniz Institute for Solid State and Materials Research, 01069 Dresden, Germany*

<sup>3</sup>*Department of Physics, Massachusetts Institute of Technology,  
Cambridge, Massachusetts 02139, USA*

<sup>4</sup>*Department of Condensed Matter Physics,  
Weizmann Institute of Science, Rehovot 7610001, Israel*

<sup>5</sup>*Department of Applied Physics, University of Tokyo, Tokyo 113-8656, Japan*

<sup>6</sup>*Donostia International Physics Center,  
P. Manuel de Lardizabal 4, 20018 Donostia-San Sebastian, Spain*

<sup>7</sup>*IKERBASQUE, Basque Foundation for Science,  
Maria Diaz de Haro 3, 48013 Bilbao, Spain*

<sup>8</sup>*RIKEN Center for Emergent Matter Science (CEMS), Wako 351-0198, Japan*

<sup>9</sup>*Department of Applied Physics and Quantum Phase Electronics Center (QPEC),  
University of Tokyo, Tokyo 113-8656, Japan*

<sup>10</sup>*Department of Condensed Matter Physics,  
Weizmann Institute of Science, Rehovot 7610001, Israel*

*Email: binghai.yan@weizmann.ac.il*

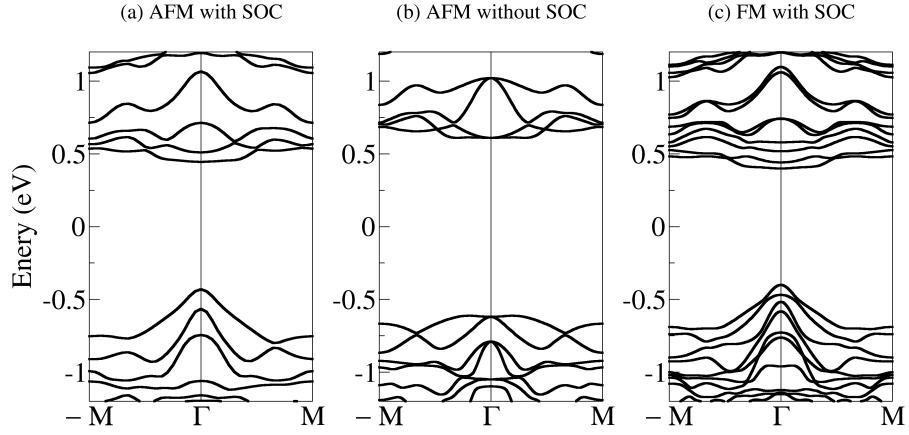

Supplementary Fig. 1. Band structure of the bilayer  $\text{CrI}_3$  for the (a) AFM phase with SOC, (b) AFM without including SOC and (c) FM phase with SOC. In both (b) and (c), the  $\mathbf{k}$  to  $-\mathbf{k}$  symmetry is preserved in the band structure. In contrast, momentum inversion symmetry is broken in (a).

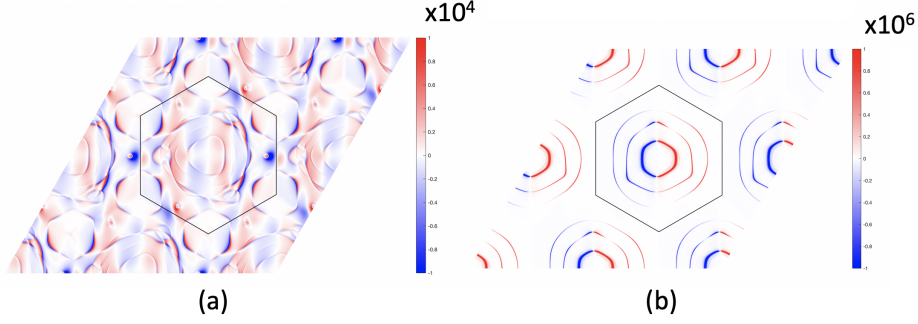

Supplementary Fig. 2. The photoconductivity contributions from (a) the three-band and (b) two-band processes. Distribution of the photoconductivity  $\sigma_{xx}^x$  ( $\hbar\omega = 1.2$  eV) in the first Brillouin zone, the hexagonal area. Note that the colorbar of the three-band contribution is two orders in magnitude smaller than the two-band one. The momentum inversion symmetry is broken in both (a) and (b). The three-band distribution is relatively uniform in the Brillouin zone, because it has no energy selection rule.

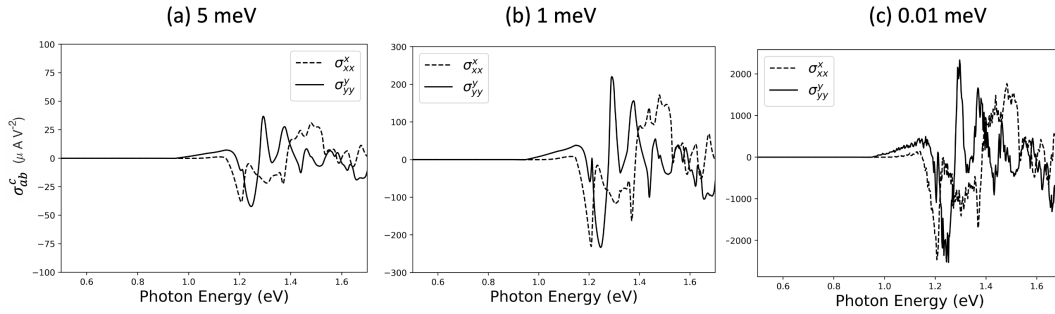

Supplementary Fig. 3. The photoconductivity for different relaxation time (a)  $\hbar/\tau = 5$  meV, (b) 1 meV (same as Fig. 2a) and (c) 0.01 meV. The photoconductivity scales linearly with  $\tau$ .

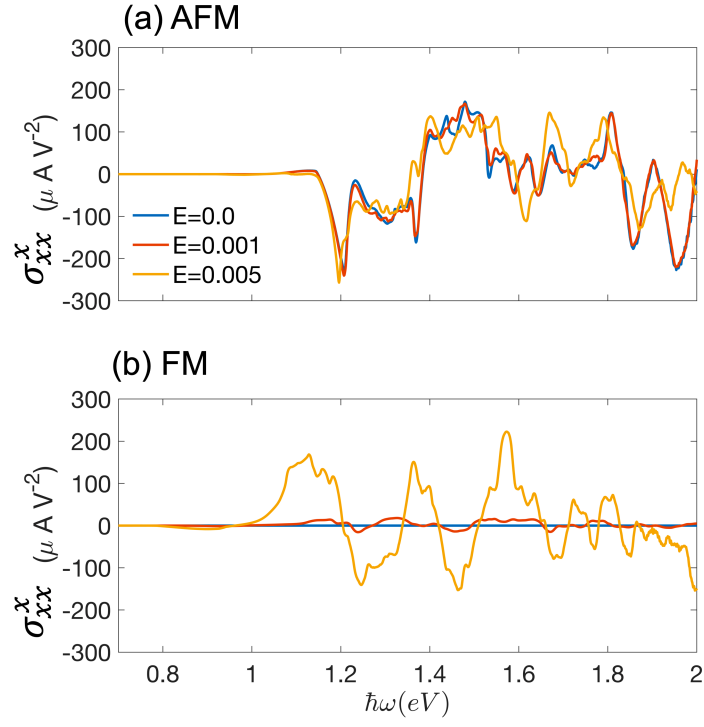

Supplementary Fig. 4. The photoconductivity  $\sigma_{xx}^x$  in different electric field applied for the (a) AFM and (b) FM phases. The electric field  $E$  is in unit of  $\text{V}/a.u.$  ( $1 a.u. = 0.53 \text{ \AA}$ ).
